# Supplementary material
Source: publisher figshare collection journal article supplement (https://rs.figshare.com/ndownloader/files/13806809)
Supplement: Supplementary file 1 [file 13806809]

**Table S1**: Species used in the study and their dispersal mode, number of trees from which seeds were collected, sample size, percentage of pre-dispersal insect predation, average mass of seeds, and the monitoring period.
